# Supplementary material
Source: Springer Nature journal article supplement (https://www.springermedizin.de/resource/supplementary/13058_2014_3424_MOESM8_ESM.pdf/9704150)

SUM159

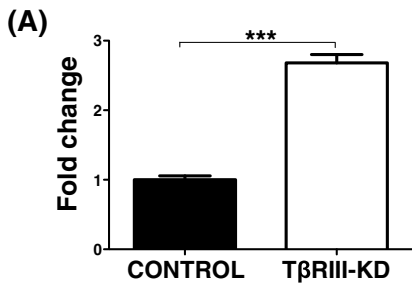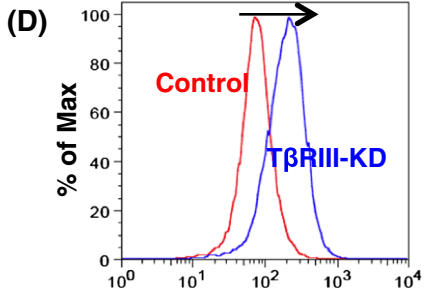

MDA-MD-231

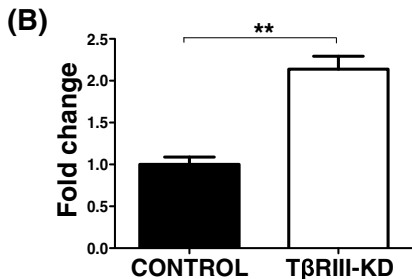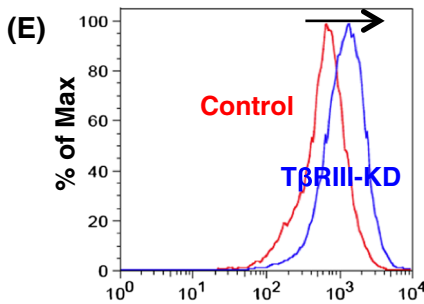

MDA-MB-157

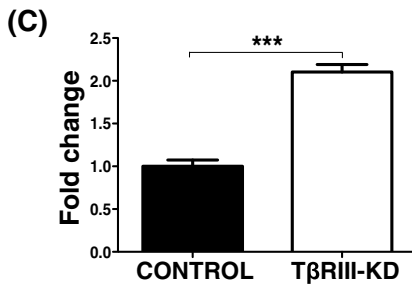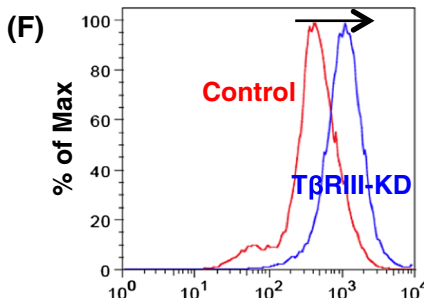

Supplement: MOESM8 [file 9704150]
